# Supplementary material
Source: HighWire-hosted journal article supplement (https://www.cmajopen.ca/highwire/filestream/81339/field_highwire_adjunct_files/4/2020-0098-5-at.pdf)
Supplement: 2020-0098-5-at.pdf [file 2020-0098-5-at.pdf]

## Appendix 5 (as supplied by the authors):

Supplementary Table S4 – Weekly number of diagnostic scans, total diagnostic scan time, and LOS days diverted with an assumption that of all patients presenting to the emergency room department, 60% may be avoidable. The estimate of 60% avoidable is based on a prior literature that ~50% of all transfers are not admitted (18), and results from Table 2 that 10% of all transfers (20% of those admitted) are admitted for ≤72 hours. 95% prediction intervals in parentheses. Each site represents one acute care hospital in GEMINI.

LOS – Length of Stay.

|         | US             |                | CT                |                | X-ray             |                   | LOS            |
|---------|----------------|----------------|-------------------|----------------|-------------------|-------------------|----------------|
|         | scans/week     | hrs/week       | scans/week        | hrs/week       | scans/week        | hrs/week          | days/week      |
| Site A  | 1.5 [1, 2.1]   | 1.4 [0.9, 1.9] | 11 [8.6, 13.3]    | 5.5 [4.3, 6.7] | 26.3 [23.2, 29.3] | 13.1 [11.6, 14.6] | 5.9 [5.4, 6.5] |
| Site B  | 1.9 [1.2, 2.6] | 1.7 [1.1, 2.3] | 16.2 [12.7, 19.7] | 8.1 [6.3, 9.9] | 30.3 [26.8, 33.8] | 15.2 [13.4, 16.9] | 7.1 [6.5, 7.8] |
| Site C  | 0.9 [0.6, 1.3] | 0.8 [0.5, 1.1] | 6.2 [4.8, 7.5]    | 3.1 [2.4, 3.8] | 13.3 [11.8, 14.8] | 6.7 [5.9, 7.4]    | 3.4 [3.0, 3.7] |
| Site D  | 2.7 [1.7, 3.7] | 2.4 [1.5, 3.3] | 8.7 [6.8, 10.6]   | 4.4 [3.4, 5.3] | 21.3 [18.8, 23.8] | 10.7 [9.4, 11.9]  | 4.6 [4.2, 5.0] |
| Site E  | 3.4 [2.2, 4.6] | 3.1 [1.9, 4.2] | 12.8 [10, 15.6]   | 6.4 [5, 7.8]   | 23.5 [20.8, 26.3] | 11.8 [10.4, 13.1] | 6.3 [5.7, 6.9] |
| Site F  | 2.3 [1.5, 3.2] | 2.1 [1.3, 2.8] | 8.3 [6.5, 10.2]   | 4.2 [3.3, 5.1] | 16.2 [14.4, 18.1] | 8.1 [7.2, 9.1]    | 3.8 [3.5, 4.2] |
| Site G  | 3.2 [2, 4.4]   | 2.9 [1.8, 3.9] | 13.5 [10.6, 16.4] | 6.7 [5.3, 8.2] | 26.8 [23.7, 29.9] | 13.4 [11.8, 14.9] | 6.2 [5.7, 6.8] |
| Average | 2.6 [1.7, 3.5] | 2.3 [1.5, 3.2] | 11.9 [9.3, 14.5]  | 5.9 [4.6, 7.2] | 23.9 [21.2, 26.7] | 12 [10.6, 13.3]   | 5.7 [5.1, 6.2] |
